# Supplementary material for: A model study on the photodecarbonyl reaction of (η5-C5H5)M(CO)2 (M = Co, Rh, Ir)
Source: Royal Society of Chemistry journal article supplement (doi:10.1039/c8ra03866j), 2018-01-01
Supplement: c8ra03866j1.pdf [file c8ra03866j1.pdf]

# Supporting Information

## A Model Study on the Photodecarbonyl Reaction of ( $\eta^5$ - $C_5H_5$ )M(CO)<sub>2</sub> (M = Co, Rh, Ir)

Zheng-Feng Zhang<sup>1</sup> and Ming-Der Su<sup>1,2\*</sup>

<sup>1</sup>Department of Applied Chemistry, National Chiayi University, Chiayi 60004,  
Taiwan

<sup>2</sup>Department of Medicinal and Applied Chemistry, Kaohsiung Medical  
University, Kaohsiung 80708, Taiwan

\*E-mail: [midesu@mail.ncyu.edu.tw](mailto:midesu@mail.ncyu.edu.tw)

-----  
B3PW91/Def2-TZVPPD

(singlet)

-----

| Atomic<br>Number | Coordinates (Angstroms) |           |           |
|------------------|-------------------------|-----------|-----------|
|                  | X                       | Y         | Z         |
| Co               | 0.000000                | 0.000000  | 0.000000  |
| C                | 1.211873                | 0.000000  | 1.722987  |
| C                | -0.787946               | 0.955901  | -1.215367 |
| O                | -1.307504               | 1.586207  | -2.016760 |
| H                | 2.289480                | -0.038990 | 1.724139  |
| C                | 0.332222                | -1.136079 | 1.711676  |
| H                | 0.635011                | -2.171507 | 1.702546  |
| C                | -0.951273               | 0.743293  | 1.685389  |
| H                | -1.801098               | 1.407319  | 1.652957  |
| C                | -1.002834               | -0.674252 | 1.736734  |
| H                | -1.897129               | -1.275528 | 1.750147  |
| C                | 0.420173                | 1.158495  | 1.716567  |
| H                | 0.787756                | 2.171991  | 1.712084  |
| C                | 0.806038                | -0.971983 | -1.191225 |
| O                | 1.337324                | -1.612648 | -1.976401 |

-----

SCF

Done: E(B3PW91/Def2-TZVPPD) = -1803.0270035

Free energy: E(B3PW91/Def2-TZVPPD) = -1802.962336

-----  
(triplet)

-----

| Atomic<br>Number | Coordinates (Angstroms) |           |           |
|------------------|-------------------------|-----------|-----------|
|                  | X                       | Y         | Z         |
| Co               | 0.000000                | 0.000000  | 0.000000  |
| C                | 1.203093                | 0.000000  | 2.032646  |
| C                | -0.718104               | 1.437488  | -1.183412 |
| O                | -1.122834               | 2.247671  | -1.850396 |
| H                | 2.280757                | 0.011398  | 2.086157  |
| C                | 0.386472                | -1.151135 | 1.979356  |
| H                | 0.729781                | -2.173702 | 1.985083  |
| C                | -0.980803               | 0.693437  | 2.003549  |
| H                | -1.861450               | 1.316061  | 2.031061  |

-----

|   |           |           |           |
|---|-----------|-----------|-----------|
| C | -0.966436 | -0.721395 | 1.943504  |
| H | -1.831130 | -1.366844 | 1.917195  |
| C | 0.359973  | 1.139345  | 2.044500  |
| H | 0.684474  | 2.166418  | 2.109037  |
| C | 1.349660  | -0.797978 | -1.219269 |
| O | 2.114306  | -1.250070 | -1.910042 |

-----

SCF Done: E(UB3PW91/Def2-TZVPPD) = -1802.999141

Free energy: E(UB3PW91/Def2-TZVPPD) = -1802.93875

-----

B3LYP/TZP-DKH

(singlet)

-----

| Atomic<br>Number | Coordinates (Angstroms) |           |           |
|------------------|-------------------------|-----------|-----------|
|                  | X                       | Y         | Z         |
| Co               | 0.000000                | 0.000000  | 0.000000  |
| C                | 1.208437                | 0.000000  | 1.749450  |
| C                | -0.992001               | 0.769366  | -1.219104 |
| O                | -1.640653               | 1.272441  | -2.016255 |
| H                | 2.286077                | -0.039382 | 1.746177  |
| C                | 0.330337                | -1.141141 | 1.761901  |
| H                | 0.630208                | -2.177037 | 1.769872  |
| C                | -0.948240               | 0.747373  | 1.716310  |
| H                | -1.795154               | 1.414883  | 1.683434  |
| C                | -0.998709               | -0.677578 | 1.776371  |
| H                | -1.890281               | -1.282469 | 1.797128  |
| C                | 0.418392                | 1.163516  | 1.753757  |
| H                | 0.783034                | 2.177559  | 1.754312  |
| C                | 0.998882                | -0.802302 | -1.193728 |
| O                | 1.651458                | -1.326451 | -1.973597 |

-----

SCF Done: E(B3LYP/TZP-DKH) = -1800.858765

Free energy: E(B3LYP/TZP-DKH) = -1800.925813

-----

(triplet)

-----

| Atomic<br>Number | Coordinates (Angstroms) |   |   |
|------------------|-------------------------|---|---|
|                  | X                       | Y | Z |

-----

|    |           |           |           |
|----|-----------|-----------|-----------|
| Co | 0.000000  | 0.000000  | 0.000000  |
| C  | 1.204846  | 0.000000  | 2.001075  |
| C  | -1.322916 | 0.763708  | -1.100995 |
| O  | -2.121744 | 1.224865  | -1.765819 |
| H  | 2.282678  | 0.003253  | 2.050832  |
| C  | 0.381422  | -1.145549 | 1.905516  |
| H  | 0.722198  | -2.169025 | 1.869833  |
| C  | -0.979655 | 0.701158  | 1.995990  |
| H  | -1.856377 | 1.328646  | 2.041216  |
| C  | -0.977618 | -0.710431 | 1.907042  |
| H  | -1.850134 | -1.344485 | 1.872759  |
| C  | 0.367363  | 1.144470  | 2.023044  |
| H  | 0.696433  | 2.169643  | 2.092545  |
| C  | 1.531612  | 0.075980  | -1.091624 |
| O  | 2.456805  | 0.121877  | -1.751035 |

-----

SCF Done: E(UB3LYP/TZP-DKH) = -1800.9025418

Free energy: E(UB3LYP/TZP-DKH) = -1800.8450511

-----

-----

Co-S0-Rea

-----

| Atomic<br>Number | Coordinates (Angstroms) |             |             |
|------------------|-------------------------|-------------|-------------|
|                  | X                       | Y           | Z           |
| H                | 1.62624500              | 1.35935500  | 1.84665200  |
| C                | 1.63202600              | 0.71208200  | 0.98477500  |
| C                | 1.62288000              | 1.13464100  | -0.37674700 |
| H                | 1.62752900              | -1.32580400 | 1.87149800  |
| H                | 1.62488200              | 2.15895700  | -0.71484600 |
| C                | 1.66680000              | -0.01132600 | -1.20418800 |
| H                | 1.68683800              | -0.02150100 | -2.28152100 |
| C                | 1.62270500              | -1.14179200 | -0.35557300 |
| H                | 1.62332700              | -2.17216500 | -0.67450100 |
| C                | 1.63260200              | -0.69438100 | 0.99790200  |
| Co               | -0.18795800             | -0.00004800 | -0.01555400 |
| C                | -1.43634500             | 1.33392200  | -0.00737900 |
| O                | -2.18290800             | 2.18085000  | 0.01119700  |

|   |             |             |             |
|---|-------------|-------------|-------------|
| C | -1.43661600 | -1.33396400 | -0.00575700 |
| O | -2.18437500 | -2.17992900 | 0.01061400  |

---

CAS, E = -1802.905266

MP2-CAS, E = -1802.839247

---

Co-T1-Min

---

| Atomic<br>Number | Coordinates (Angstroms) |             |             |
|------------------|-------------------------|-------------|-------------|
|                  | X                       | Y           | Z           |
| H                | 1.43894500              | 1.33221200  | 1.95151700  |
| C                | 1.53447000              | 0.70304000  | 1.08013000  |
| C                | 1.71772300              | 1.14532100  | -0.24986700 |
| H                | 1.43544300              | -1.34752800 | 1.94485100  |
| H                | 1.78806000              | 2.17123100  | -0.57625800 |
| C                | 1.80939300              | -0.00126100 | -1.07973500 |
| H                | 1.97552700              | 0.00085100  | -2.14617700 |
| C                | 1.71550700              | -1.15107600 | -0.25463100 |
| H                | 1.78283900              | -2.17568100 | -0.58533900 |
| C                | 1.53331700              | -0.71415800 | 1.07680900  |
| Co               | -0.29971500             | 0.00055800  | -0.22158600 |
| C                | -1.48116200             | 1.59253300  | -0.00915300 |
| O                | -2.01566200             | 2.57257600  | 0.12894600  |
| C                | -1.48923500             | -1.58639900 | -0.00669000 |
| O                | -2.03041200             | -2.56309400 | 0.12768400  |

---

CAS, E = -1802.8919598

MP2-CAS, E = -1802.8350701

---

Co-T1-TS1

---

| Atomic<br>Number | Coordinates (Angstroms) |             |             |
|------------------|-------------------------|-------------|-------------|
|                  | X                       | Y           | Z           |
| H                | -1.29323500             | -2.08459800 | -1.36477400 |
| C                | -1.43952400             | -1.21783800 | -0.71563400 |
| C                | -1.76263200             | 0.10157900  | -1.14656500 |
| H                | -1.28774800             | -2.10144400 | 1.34136000  |
| H                | -1.89920100             | 0.42015300  | -2.18181000 |

|     |       |       |       |             |             |             |
|-----|-------|-------|-------|-------------|-------------|-------------|
|     | C     |       |       | -1.96901200 | 0.89790600  | 0.00780500  |
|     | H     |       |       | -2.28767200 | 1.94177700  | 0.01475900  |
|     | C     |       |       | -1.75822300 | 0.08765500  | 1.15159800  |
|     | H     |       |       | -1.89090200 | 0.39352600  | 2.19119000  |
|     | C     |       |       | -1.43642700 | -1.22679100 | 0.70344000  |
|     | Co    |       |       | 0.24563100  | 0.07284500  | 0.00025100  |
|     | C     |       |       | 1.19466200  | 1.67985700  | -0.00387200 |
|     | O     |       |       | 1.67205900  | 2.70726500  | 0.00162900  |
|     | C     |       |       | 1.74951200  | -1.34374000 | 0.00005400  |
|     | O     |       |       | 2.64751600  | -2.00826300 | -0.00018700 |
| -1  | -0.24 | 0.06  | 0.00  |             |             |             |
| -2  | -0.19 | 0.07  | 0.00  |             |             |             |
| -3  | -0.08 | 0.10  | 0.00  |             |             |             |
| -4  | -0.24 | 0.06  | -0.00 |             |             |             |
| -5  | -0.06 | 0.11  | 0.00  |             |             |             |
| -6  | -0.02 | 0.11  | 0.00  |             |             |             |
| -7  | 0.05  | 0.14  | 0.00  |             |             |             |
| -8  | -0.08 | 0.10  | 0.00  |             |             |             |
| -9  | -0.06 | 0.10  | 0.00  |             |             |             |
| -10 | -0.19 | 0.07  | -0.00 |             |             |             |
| -11 | -0.09 | -0.10 | -0.00 |             |             |             |
| -12 | 0.10  | -0.25 | -0.00 |             |             |             |
| -13 | 0.16  | -0.27 | 0.00  |             |             |             |
| -14 | 0.08  | -0.05 | 0.00  |             |             |             |
| -15 | 0.49  | 0.51  | 0.00  |             |             |             |

-----

CAS, E = -1802.876195

MP2-CAS, E = -1802.8196451

-----

Co-T1-Int

-----

| Atomic<br>Number | Coordinates (Angstroms) |             |             |
|------------------|-------------------------|-------------|-------------|
|                  | X                       | Y           | Z           |
| H                | 1.43894500              | 1.33221200  | 1.95151700  |
| C                | 1.53447000              | 0.70304000  | 1.08013000  |
| C                | 1.71772300              | 1.14532100  | -0.24986700 |
| H                | 1.43544300              | -1.34752800 | 1.94485100  |
| H                | 1.78806000              | 2.17123100  | -0.57625800 |
| C                | 1.80939300              | -0.00126100 | -1.07973500 |

|    |             |             |             |
|----|-------------|-------------|-------------|
| H  | 1.97552700  | 0.00085100  | -2.14617700 |
| C  | 1.71550700  | -1.15107600 | -0.25463100 |
| H  | 1.78283900  | -2.17568100 | -0.58533900 |
| C  | 1.53331700  | -0.71415800 | 1.07680900  |
| Co | -0.29971500 | 0.00055800  | -0.22158600 |
| C  | -1.48116200 | 1.59253300  | -0.00915300 |
| O  | -2.01566200 | 2.57257600  | 0.12894600  |

-----

CAS, E = -1689.5161959

MP2-CAS, E = -1689.4875957

-----

Co-T1/S0-2

-----

| Atomic<br>Number | Coordinates (Angstroms) |             |             |
|------------------|-------------------------|-------------|-------------|
|                  | X                       | Y           | Z           |
| H                | -2.0581862              | 1.9935503   | -0.4438668  |
| C                | -1.8317962              | 0.9874327   | -0.1269982  |
| C                | -1.5856902              | 0.5763042   | 1.2108906   |
| H                | -1.9560904              | -0.1681627  | -2.0305604  |
| H                | -1.5776421              | 1.2154792   | 2.0787190   |
| C                | -1.3353655              | -0.8104309  | 1.1912813   |
| H                | -1.1080806              | -1.4289972  | 2.0449090   |
| C                | -1.4513071              | -1.2602135  | -0.1559084  |
| H                | -1.3298407              | -2.2781320  | -0.4914058  |
| C                | -1.7885089              | -0.1544800  | -0.9658939  |
| Co               | 0.2030714               | 0.1853874   | -0.0385511  |
| C                | 1.6803665               | -0.9436041  | 0.0099151   |
| O                | 2.5400801               | -1.6726019  | 0.0483674   |
| -1               | -0.00132824             | -0.00016155 | 0.00026013  |
| -2               | -0.04095417             | 0.00856217  | 0.00778129  |
| -3               | -0.00288069             | 0.01213818  | -0.01687695 |
| -4               | -0.00035563             | 0.00001475  | -0.00062369 |
| -5               | 0.00050431              | 0.00079373  | 0.00045389  |
| -6               | -0.01315121             | -0.02457932 | -0.01031450 |
| -7               | -0.00026288             | -0.00048818 | 0.00020381  |
| -8               | -0.02173371             | -0.01901704 | 0.02002129  |
| -9               | -0.00086780             | -0.00029886 | 0.00024838  |
| -10              | 0.00828191              | 0.00977824  | 0.00297021  |
| -11              | -0.00937107             | 0.00017531  | 0.02082188  |

|     |             |             |            |
|-----|-------------|-------------|------------|
| -12 | 0.05855802  | -0.07385384 | 0.00053230 |
| -13 | -0.00277094 | 0.00344291  | 0.00106284 |

---

CAS, E = -1689.5099780

MP2-CAS, E = -1689.437196

---

Co-T1-Cpx

---

| Atomic<br>Number | Coordinates (Angstroms) |             |             |
|------------------|-------------------------|-------------|-------------|
|                  | X                       | Y           | Z           |
| H                | 1.55173300              | 0.39976600  | 2.06233600  |
| C                | 0.60248000              | 0.04295800  | 1.69233200  |
| C                | 0.33800300              | -1.25648800 | 1.19684500  |
| H                | -0.73706900             | 1.80303400  | 1.97560400  |
| H                | 1.04404400              | -2.07108300 | 1.14207300  |
| C                | -1.03995300             | -1.32084200 | 0.85044100  |
| H                | -1.55897400             | -2.18696900 | 0.47045600  |
| C                | -1.61640400             | -0.06362600 | 1.13497800  |
| H                | -2.64988600             | 0.20692600  | 0.98064700  |
| C                | -0.60541500             | 0.78448100  | 1.64598300  |
| Co               | 0.04874300              | 0.20125500  | -0.50727800 |
| C                | -0.97229400             | 0.90177000  | -1.94457300 |
| O                | -1.70514100             | 1.27302300  | -2.72527000 |
| Si               | 2.58882500              | 0.31522100  | -2.21231000 |
| C                | 4.42316500              | 0.20378300  | -1.87549500 |
| H                | 4.93280900              | -0.19912600 | -2.75614500 |
| H                | 4.63897700              | -0.45466600 | -1.03105500 |
| H                | 4.84875100              | 1.18514400  | -1.66144300 |
| C                | 2.23735500              | 1.42164900  | -3.67644800 |
| H                | 2.59025600              | 0.95843600  | -4.60339300 |
| H                | 2.74437900              | 2.38269500  | -3.56376300 |
| H                | 1.16647100              | 1.61688000  | -3.78557300 |
| C                | 1.87434700              | -1.39973900 | -2.45395100 |
| H                | 2.39976700              | -1.89921200 | -3.27189800 |
| H                | 0.81228000              | -1.38692300 | -2.70958200 |
| H                | 1.99832500              | -2.00712400 | -1.55510200 |
| H                | 1.93454100              | 0.93376300  | -1.00198900 |

---

CAS, E = -2099.4876195



MP2-CAS, E = -2099.4436565

---

Co-S0-Int

---

| Atomic<br>Number | Coordinates (Angstroms) |             |             |
|------------------|-------------------------|-------------|-------------|
|                  | X                       | Y           | Z           |
| H                | 2.28005800              | -1.78310700 | 0.03444500  |
| C                | 1.82671800              | -0.80469000 | 0.01883500  |
| C                | 1.50989700              | -0.00907500 | 1.15398300  |
| H                | 1.67942700              | -0.35097100 | -2.16178700 |
| H                | 1.64713300              | -0.29554300 | 2.18502100  |
| C                | 1.00863900              | 1.22936500  | 0.69627600  |
| H                | 0.68564600              | 2.04927000  | 1.31809700  |
| C                | 1.02005200              | 1.21223200  | -0.72234600 |
| H                | 0.70781000              | 2.01674500  | -1.36912600 |
| C                | 1.52749700              | -0.03775600 | -1.14068500 |
| Co               | -0.35484400             | -0.50414400 | -0.00128100 |
| C                | -2.16375800             | -0.04417600 | -0.00319500 |
| O                | -3.22419300             | 0.33751100  | 0.00134300  |

---

CAS, E = -1689.4898887

MP2-CAS, E = -1689.4456070

---

Co-S0-Cpx

---

| Atomic<br>Number | Coordinates (Angstroms) |             |             |
|------------------|-------------------------|-------------|-------------|
|                  | X                       | Y           | Z           |
| H                | 1.54894900              | -2.32152300 | -1.41392700 |
| C                | 1.88573300              | -1.55677300 | -0.73118500 |
| C                | 1.68115200              | -1.55950100 | 0.68080700  |
| H                | 2.96125200              | -0.13133800 | -2.06283200 |
| H                | 1.17141300              | -2.32785000 | 1.24254200  |
| C                | 2.28184300              | -0.40100900 | 1.20792000  |
| H                | 2.30735500              | -0.10740400 | 2.24512600  |
| C                | 2.83030100              | 0.33313600  | 0.11737800  |
| H                | 3.35831600              | 1.27135900  | 0.19432200  |
| C                | 2.63500500              | -0.41210500 | -1.07426000 |
| Co               | 0.68865100              | 0.21275000  | -0.20859800 |

|    |             |             |             |
|----|-------------|-------------|-------------|
| C  | 0.22167900  | 1.95991100  | -0.05517000 |
| O  | -0.03358700 | 3.05757500  | 0.07454100  |
| Si | -2.01863300 | -0.36425900 | -0.04209000 |
| C  | -2.72810500 | -2.02734500 | -0.51454500 |
| H  | -3.74485800 | -2.12184600 | -0.12292700 |
| H  | -2.13126900 | -2.84333600 | -0.10092100 |
| H  | -2.77053300 | -2.14945500 | -1.59765300 |
| C  | -3.05374600 | 1.02522500  | -0.74194400 |
| H  | -4.00686700 | 1.09367000  | -0.20829400 |
| H  | -3.26808500 | 0.84665300  | -1.79830700 |
| H  | -2.55304000 | 1.99321600  | -0.65747300 |
| C  | -1.86432900 | -0.24428000 | 1.81354100  |
| H  | -2.84727800 | -0.42407900 | 2.26030500  |
| H  | -1.51709400 | 0.73960000  | 2.12887600  |
| H  | -1.16867200 | -0.98986900 | 2.20087300  |
| H  | -0.74080700 | -0.33655900 | -0.89987300 |

-----  
CAS, E = -2099.4539778

MP2-CAS, E = -2099.408399

-----  
Co-S0-TS1

| Atomic<br>Number | Coordinates (Angstroms) |             |            |
|------------------|-------------------------|-------------|------------|
|                  | X                       | Y           | Z          |
| Si               | 0.00000000              | 0.00000000  | 0.00000000 |
| Co               | 0.00000000              | 0.00000000  | 3.07061600 |
| H                | 1.28706500              | 0.00000000  | 0.72564500 |
| C                | 0.06191500              | 1.80609200  | 3.34343700 |
| C                | 1.08003300              | -1.95885100 | 2.89483300 |
| C                | -0.17940800             | -2.14774400 | 3.54070300 |
| C                | -0.16857500             | -1.43644800 | 4.75750500 |
| C                | 1.06454300              | -0.73452000 | 4.81785700 |
| C                | 1.85870900              | -1.10908800 | 3.69521900 |
| H                | 1.37712400              | -2.40172100 | 1.95640400 |
| H                | 2.85929300              | -0.76769600 | 3.48389600 |
| H                | -0.98237500             | -2.77131700 | 3.17727500 |
| H                | -0.96321000             | -1.39564200 | 5.48438800 |
| H                | 1.38148300              | -0.08975400 | 5.62280000 |
| O                | 0.13258100              | 2.92332600  | 3.51163900 |

|     |       |       |       |             |             |             |
|-----|-------|-------|-------|-------------|-------------|-------------|
|     | C     |       |       | -0.32207100 | -1.75541400 | -0.56323100 |
|     | H     |       |       | -1.19124800 | -1.80081500 | -1.22302300 |
|     | H     |       |       | -0.51319100 | -2.40260700 | 0.29544700  |
|     | H     |       |       | 0.53296300  | -2.16053000 | -1.10661400 |
|     | C     |       |       | 0.05344700  | 1.18839800  | -1.44192900 |
|     | H     |       |       | -0.88736900 | 1.16650800  | -1.99564500 |
|     | H     |       |       | 0.85540400  | 0.92084700  | -2.13190200 |
|     | H     |       |       | 0.22641600  | 2.21197100  | -1.10610500 |
|     | C     |       |       | -1.45747500 | 0.51132900  | 1.08442500  |
|     | H     |       |       | -2.33608900 | 0.18267000  | 0.52003600  |
|     | H     |       |       | -1.53903400 | 1.59146300  | 1.19934600  |
|     | H     |       |       | -1.65583900 | 0.04006100  | 2.06994200  |
| -1  | -0.07 | 0.03  | -0.00 |             |             |             |
| -2  | -0.06 | 0.02  | -0.01 |             |             |             |
| -3  | -0.03 | 0.00  | -0.01 |             |             |             |
| -4  | -0.12 | 0.11  | 0.03  |             |             |             |
| -5  | -0.01 | -0.01 | -0.01 |             |             |             |
| -6  | 0.03  | -0.05 | -0.02 |             |             |             |
| -7  | 0.05  | -0.09 | -0.02 |             |             |             |
| -8  | -0.01 | -0.02 | 0.00  |             |             |             |
| -9  | -0.01 | -0.02 | -0.00 |             |             |             |
| -10 | -0.09 | 0.06  | 0.02  |             |             |             |
| -11 | 0.03  | 0.03  | 0.11  |             |             |             |
| -12 | 0.01  | 0.02  | -0.12 |             |             |             |
| -13 | 0.00  | 0.02  | -0.01 |             |             |             |
| -14 | -0.04 | -0.07 | -0.12 |             |             |             |
| -15 | -0.08 | -0.01 | 0.07  |             |             |             |
| -16 | -0.03 | 0.01  | 0.14  |             |             |             |
| -17 | -0.04 | -0.01 | 0.02  |             |             |             |
| -18 | -0.16 | -0.03 | 0.10  |             |             |             |
| -19 | -0.06 | 0.02  | 0.06  |             |             |             |
| -20 | -0.02 | 0.05  | 0.12  |             |             |             |
| -21 | -0.13 | 0.05  | 0.06  |             |             |             |
| -22 | -0.01 | -0.01 | 0.03  |             |             |             |
| -23 | 0.25  | -0.05 | -0.21 |             |             |             |
| -24 | 0.30  | -0.05 | -0.12 |             |             |             |
| -25 | 0.21  | -0.03 | -0.22 |             |             |             |
| -26 | 0.27  | -0.05 | -0.22 |             |             |             |
| -27 | -0.35 | -0.26 | -0.38 |             |             |             |

CAS, E = -2099.320017

MP2-CAS, E = -2099.2417919

-----  
Co-T1-TS2  
-----

| Atomic<br>Number | Coordinates (Angstroms) |             |             |
|------------------|-------------------------|-------------|-------------|
|                  | X                       | Y           | Z           |
| H                | 0.99471100              | -2.36607900 | -1.41109800 |
| C                | 1.43020000              | -1.63245500 | -0.72770000 |
| C                | 1.34263100              | -1.66826500 | 0.66581000  |
| H                | 2.63254800              | -0.36875100 | -2.10444600 |
| H                | 0.82181800              | -2.42229800 | 1.26032700  |
| C                | 2.09529200              | -0.60682800 | 1.16347300  |
| H                | 2.27357400              | -0.38705300 | 2.21887900  |
| C                | 2.69232500              | 0.03982300  | 0.08003100  |
| H                | 3.42176700              | 0.85094600  | 0.14774600  |
| C                | 2.29095900              | -0.59826600 | -1.09304900 |
| Co               | 0.52085800              | 0.21481500  | -0.07479000 |
| C                | 0.61320100              | 2.02015200  | -0.01531600 |
| O                | 0.64266300              | 3.14981100  | 0.01277400  |
| Si               | -1.73558400             | -0.21457200 | -0.05620400 |
| C                | -2.27983000             | -1.98078000 | -0.40074000 |
| H                | -3.35299200             | -2.08886600 | -0.21526900 |
| H                | -1.75273700             | -2.68228500 | 0.25277400  |
| H                | -2.08821200             | -2.27278800 | -1.43774600 |
| C                | -2.81729200             | 1.01876000  | -0.97446500 |
| H                | -3.87270400             | 0.83647800  | -0.74904200 |
| H                | -2.69156700             | 0.94978900  | -2.05934600 |
| H                | -2.57991100             | 2.04253600  | -0.66973500 |
| C                | -2.17892600             | 0.06118800  | 1.74984300  |
| H                | -3.24811700             | -0.10813000 | 1.91118700  |
| H                | -1.94937500             | 1.08530400  | 2.05987800  |
| H                | -1.62716900             | -0.62634700 | 2.39837800  |
| H                | -1.01929700             | -0.35691200 | -1.58581800 |
| -1               | -0.14                   | 0.17        | -0.04       |
| -2               | -0.10                   | 0.08        | -0.02       |
| -3               | -0.12                   | 0.02        | -0.02       |
| -4               | 0.05                    | 0.01        | 0.02        |
| -5               | -0.19                   | 0.06        | -0.04       |

|     |       |       |       |
|-----|-------|-------|-------|
| -6  | -0.03 | -0.10 | 0.01  |
| -7  | -0.03 | -0.17 | 0.01  |
| -8  | 0.05  | -0.11 | 0.03  |
| -9  | 0.12  | -0.19 | 0.06  |
| -10 | 0.01  | -0.01 | 0.01  |
| -11 | 0.11  | 0.09  | 0.04  |
| -12 | 0.12  | 0.08  | -0.00 |
| -13 | 0.04  | 0.08  | 0.01  |
| -14 | -0.10 | -0.11 | -0.08 |
| -15 | -0.13 | -0.06 | 0.09  |
| -16 | -0.07 | -0.01 | 0.18  |
| -17 | -0.08 | -0.06 | 0.04  |
| -18 | -0.23 | -0.10 | 0.13  |
| -19 | -0.16 | -0.07 | 0.05  |
| -20 | -0.11 | -0.08 | 0.13  |
| -21 | -0.25 | -0.04 | 0.06  |
| -22 | -0.14 | -0.08 | 0.03  |
| -23 | 0.09  | -0.06 | -0.16 |
| -24 | 0.12  | 0.02  | -0.12 |
| -25 | 0.13  | -0.08 | -0.23 |
| -26 | 0.08  | -0.07 | -0.16 |
| -27 | -0.28 | -0.20 | -0.23 |

-----  
CAS, E = -2099.4746959

MP2-CAS, E = -2099.4345830  
-----

Co-T1/S0-1  
-----

| Atomic<br>Number | Coordinates (Angstroms) |            |            |
|------------------|-------------------------|------------|------------|
|                  | X                       | Y          | Z          |
| H                | -3.3734927              | 0.7678585  | -1.0374329 |
| C                | -2.7738306              | 0.0292734  | -0.5303817 |
| C                | -2.4781289              | 0.0130543  | 0.8652789  |
| H                | -2.1529191              | -1.3383263 | -2.1668715 |
| H                | -2.8339983              | 0.7267653  | 1.5909460  |
| C                | -1.6894042              | -1.1258545 | 1.1394397  |
| H                | -1.3183747              | -1.4259254 | 2.1057403  |
| C                | -1.4326738              | -1.7676571 | -0.0949368 |
| H                | -0.8468090              | -2.6644022 | -0.2324255 |

|     |             |             |             |            |
|-----|-------------|-------------|-------------|------------|
|     | C           | -2.1351609  | -1.0746853  | -1.1220717 |
|     | Co          | -0.6086969  | 0.2429917   | -0.2249828 |
|     | C           | -0.2439033  | 2.0175769   | -0.0832265 |
|     | O           | -0.0383961  | 3.1286099   | -0.0079055 |
|     | Si          | 1.8612865   | -0.3014804  | -0.0212242 |
|     | C           | 1.6826522   | -1.0406824  | 1.6900257  |
|     | H           | 1.1792711   | -0.3636999  | 2.3787573  |
|     | H           | 2.6848223   | -1.2519522  | 2.0756141  |
|     | H           | 1.1272034   | -1.9785223  | 1.6585551  |
|     | C           | 2.8537534   | 1.2819796   | 0.0450287  |
|     | H           | 2.8438963   | 1.7932499   | -0.9192704 |
|     | H           | 3.8924634   | 1.0533922   | 0.2935502  |
|     | H           | 2.4721487   | 1.9723526   | 0.7978369  |
|     | C           | 2.7547020   | -1.5641181  | -1.0787991 |
|     | H           | 2.9480251   | -1.1848984  | -2.0830983 |
|     | H           | 2.1627683   | -2.4770461  | -1.1701232 |
|     | H           | 3.7113404   | -1.8294057  | -0.6232800 |
|     | H           | 0.7116398   | -0.0341938  | -1.0836969 |
| -1  | -0.00117521 | -0.00047187 | 0.00036839  |            |
| -2  | -0.01626575 | 0.00823656  | 0.01844443  |            |
| -3  | -0.03895935 | -0.00406570 | 0.00225815  |            |
| -4  | 0.00005467  | -0.00029422 | -0.00060278 |            |
| -5  | -0.00099712 | -0.00069833 | 0.00018643  |            |
| -6  | 0.00353370  | 0.00870154  | -0.01052194 |            |
| -7  | 0.00086785  | 0.00055447  | 0.00087960  |            |
| -8  | -0.02003536 | -0.03041522 | -0.00868336 |            |
| -9  | -0.00154227 | -0.00143864 | 0.00006043  |            |
| -10 | 0.01144018  | -0.01353582 | 0.00589211  |            |
| -11 | -0.01947205 | -0.00027088 | 0.01952530  |            |
| -12 | -0.00105159 | 0.06669007  | 0.00849942  |            |
| -13 | -0.00183669 | 0.00082601  | 0.00006866  |            |
| -14 | 0.04287515  | -0.01452891 | -0.04786831 |            |
| -15 | -0.01982869 | 0.00413226  | -0.00139174 |            |
| -16 | -0.00011628 | -0.00116417 | 0.00331831  |            |
| -17 | 0.00068130  | 0.00430656  | -0.00553522 |            |
| -18 | -0.00016672 | 0.00069915  | 0.00008406  |            |
| -19 | -0.00217392 | 0.00109046  | 0.00287667  |            |
| -20 | -0.00072312 | -0.00082094 | 0.00017372  |            |
| -21 | -0.00048442 | -0.00040917 | 0.00079783  |            |
| -22 | 0.00109962  | 0.00132460  | -0.00002346 |            |

|     |             |             |             |
|-----|-------------|-------------|-------------|
| -23 | 0.00628643  | -0.00178414 | 0.00615637  |
| -24 | -0.00054434 | 0.00093547  | 0.00082528  |
| -25 | -0.00043235 | 0.00029595  | 0.00025079  |
| -26 | 0.00114354  | -0.00199442 | -0.00152111 |
| -27 | 0.05782280  | -0.02590069 | 0.00548195  |

-----

CAS, E = -2099.4792675

MP2-CAS, E = -2099.4342528

-----

Co-S0-Pro

-----

| Atomic<br>Number | Coordinates (Angstroms) |             |             |
|------------------|-------------------------|-------------|-------------|
|                  | X                       | Y           | Z           |
| H                | 1.26958600              | -2.48948400 | -0.71423300 |
| C                | 1.67053800              | -1.57287500 | -0.31180100 |
| C                | 1.57426400              | -1.14635100 | 1.03675400  |
| H                | 2.66303800              | -0.65134300 | -2.08517000 |
| H                | 1.08454400              | -1.67778600 | 1.83700900  |
| C                | 2.19973400              | 0.11603100  | 1.13083000  |
| H                | 2.28669000              | 0.71784500  | 2.02120900  |
| C                | 2.73150200              | 0.44259100  | -0.15299500 |
| H                | 3.27221400              | 1.34255700  | -0.39935200 |
| C                | 2.41847500              | -0.60676800 | -1.03659200 |
| Co               | 0.55727600              | 0.27715300  | -0.27109000 |
| C                | -0.07804200             | 1.95981900  | -0.07994000 |
| O                | -0.50241700             | 3.00128200  | 0.03394500  |
| Si               | -1.61580800             | -0.42779800 | -0.03298500 |
| C                | -1.79209100             | -2.25880000 | -0.41025000 |
| H                | -2.81737700             | -2.57494500 | -0.20036400 |
| H                | -1.12484800             | -2.85932600 | 0.21063600  |
| H                | -1.57500200             | -2.47932300 | -1.45656800 |
| C                | -2.98283700             | 0.50770600  | -0.92342400 |
| H                | -3.95832300             | 0.18966200  | -0.54825500 |
| H                | -2.95317800             | 0.32226700  | -1.99852400 |
| H                | -2.90567000             | 1.58569700  | -0.76747800 |
| C                | -1.93429000             | -0.19394700 | 1.81276400  |
| H                | -2.93778800             | -0.55240400 | 2.06113100  |
| H                | -1.87313000             | 0.85871300  | 2.09579000  |
| H                | -1.21375200             | -0.74616700 | 2.41706700  |

H -0.46632600 0.02537800 -1.35531000

---

CAS, E = -2099.4815876

MP2-CAS, E = -2099.4341633

---

Co-T1-Pro

| Center<br>Number | Atomic<br>Number | Atomic<br>Type | Coordinates (Angstroms) |           |           |
|------------------|------------------|----------------|-------------------------|-----------|-----------|
|                  |                  |                | X                       | Y         | Z         |
|                  | Co               |                | -0.064052               | 0.016108  | 0.007512  |
|                  | C                |                | 1.173973                | 0.020348  | 2.028847  |
|                  | C                |                | -1.546811               | 0.002939  | -1.355179 |
|                  | O                |                | -1.990221               | -0.031000 | -2.414017 |
|                  | H                |                | 2.248085                | 0.047088  | 1.952343  |
|                  | C                |                | 0.368341                | -1.135807 | 2.066111  |
|                  | H                |                | 0.719792                | -2.155202 | 2.034213  |
|                  | C                |                | -1.036847               | 0.665423  | 2.248916  |
|                  | H                |                | -1.915617               | 1.284442  | 2.337681  |
|                  | C                |                | -1.002293               | -0.724618 | 2.244217  |
|                  | H                |                | -1.849615               | -1.388465 | 2.317618  |
|                  | C                |                | 0.308696                | 1.142563  | 2.069946  |
|                  | H                |                | 0.610518                | 2.177878  | 2.078687  |
|                  | Si               |                | 1.278994                | 1.523445  | -1.298340 |
|                  | H                |                | 1.122047                | -0.524185 | -0.916766 |
|                  | C                |                | 0.306277                | 3.149614  | -1.235508 |
|                  | H                |                | 0.146432                | 3.503113  | -0.215904 |
|                  | H                |                | 0.868958                | 3.918638  | -1.776337 |
|                  | H                |                | -0.669468               | 3.053650  | -1.715210 |
|                  | C                |                | 1.511080                | 1.096294  | -3.122376 |
|                  | H                |                | 0.555720                | 0.894390  | -3.611367 |
|                  | H                |                | 1.987418                | 1.927415  | -3.651720 |
|                  | H                |                | 2.139905                | 0.212105  | -3.247045 |
|                  | C                |                | 2.984135                | 1.816529  | -0.543715 |
|                  | H                |                | 2.924607                | 2.190295  | 0.480267  |
|                  | H                |                | 3.524977                | 2.559837  | -1.137010 |
|                  | H                |                | 3.578075                | 0.900266  | -0.534124 |

---

CAS, E = -2099.3663415

MP2-CAS, E = -2099.33636362

---



---

CO (singlet)

---

| Center<br>Number | Atomic<br>Number | Atomic<br>Type | Coordinates (Angstroms) |          |          |
|------------------|------------------|----------------|-------------------------|----------|----------|
|                  |                  |                | X                       | Y        | Z        |
|                  | 6                |                | 0.000000                | 0.000000 | 0.000000 |
|                  | 8                |                | 0.000000                | 0.000000 | 1.125018 |

---

CAS, E = -113.362853

MP2-CAS, E = -113.335285

---

CO (triplet)

---

| Center<br>Number | Atomic<br>Number | Atomic<br>Type | Coordinates (Angstroms) |          |          |
|------------------|------------------|----------------|-------------------------|----------|----------|
|                  |                  |                | X                       | Y        | Z        |
|                  | 6                |                | 0.000000                | 0.000000 | 0.000000 |
|                  | 8                |                | 0.000000                | 0.000000 | 1.201359 |

---

CAS, E = -113.1526371

MP2-CAS, E = -113.1154526

---

---

Rh-S0-Rea

---

| Atomic<br>Number | Coordinates (Angstroms) |           |           |
|------------------|-------------------------|-----------|-----------|
|                  | X                       | Y         | Z         |
| Rh               | 0.000000                | 0.000000  | 0.000000  |
| C                | 1.220975                | 0.000000  | 1.830109  |
| C                | -1.673741               | 0.000236  | -1.058690 |
| O                | -2.660731               | 0.000375  | -1.682990 |
| H                | 2.309331                | 0.001964  | 1.766393  |
| C                | 0.372374                | -1.200496 | 1.900582  |
| H                | 0.694522                | -2.239069 | 1.899711  |
| C                | -0.995100               | 0.737525  | 1.867747  |
| H                | -1.870018               | 1.385976  | 1.837993  |
| C                | -0.985664               | -0.755731 | 1.863261  |
| H                | -1.849527               | -1.418074 | 1.829670  |
| C                | 0.366131                | 1.196342  | 1.903903  |
| H                | 0.684525                | 2.236702  | 1.905915  |
| C                | 1.668045                | 0.003598  | -1.069601 |
| O                | 2.651542                | 0.005719  | -1.700248 |

---

CAS, E = -531.0083212

MP2-CAS, E = -530.946341

---

Rh-S1/S0-Cl

---

| Atomic<br>Number | Coordinates (Angstroms) |           |           |
|------------------|-------------------------|-----------|-----------|
|                  | X                       | Y         | Z         |
| Rh               | 0.392880                | -0.097147 | -0.682267 |
| C                | 1.007597                | -0.267965 | 1.583301  |
| C                | -1.610639               | -0.904928 | -1.529036 |
| O                | -2.595887               | -1.522524 | -1.594132 |
| H                | 1.999107                | -0.675671 | 1.586974  |
| C                | -0.203577               | -1.043705 | 1.514910  |
| H                | -0.265030               | -2.099593 | 1.352417  |
| C                | -0.702275               | 0.978946  | 2.459963  |
| H                | -1.258801               | 1.779004  | 2.903221  |

|   |           |           |           |
|---|-----------|-----------|-----------|
| C | -1.232976 | -0.271536 | 2.070660  |
| H | -2.240054 | -0.591282 | 2.193849  |
| C | 0.659257  | 0.968553  | 2.201778  |
| H | 1.336330  | 1.759732  | 2.420432  |
| C | 2.193148  | 0.766250  | -1.573818 |
| O | 3.213741  | 1.221864  | -1.748250 |

Gradient Difference :

|     |               |               |               |
|-----|---------------|---------------|---------------|
| -1  | 0.0035222130  | 0.0031087535  | 0.0072065670  |
| -2  | 0.0062705868  | -0.0025699154 | 0.0017780798  |
| -3  | 0.0017823378  | -0.0001359738 | -0.0048236558 |
| -4  | -0.0014936424 | -0.0000941507 | -0.0000082290 |
| -5  | 0.0007277131  | -0.0006128631 | -0.0003639649 |
| -6  | -0.0004597979 | -0.0068470167 | 0.0034601379  |
| -7  | 0.0011514829  | -0.0010193843 | -0.0006337642 |
| -8  | -0.0051308517 | 0.0031387776  | 0.0037393392  |
| -9  | 0.0000132697  | 0.0002918182  | -0.0006950678 |
| -10 | -0.0017239858 | 0.0000166444  | -0.0036976758 |
| -11 | -0.0033902998 | -0.0005629975 | -0.0001585338 |
| -12 | 0.0030433278  | 0.0038074849  | -0.0037923176 |
| -13 | 0.0019128013  | 0.0023125652  | 0.0002394291  |
| -14 | -0.0100875856 | -0.0023503090 | -0.0014803391 |
| -15 | 0.0038624308  | 0.0015165667  | -0.0007700048 |

---

Derivative Coupling

|     |               |               |               |
|-----|---------------|---------------|---------------|
| -1  | 0.0021168652  | -0.0014573234 | -0.0016007167 |
| -2  | -0.0028105609 | 0.0020729190  | -0.0013050303 |
| -3  | -0.0009956377 | -0.0012084326 | 0.0027404746  |
| -4  | 0.0010094100  | 0.0008284210  | -0.0006237840 |
| -5  | -0.0003479633 | 0.0003535050  | 0.0003436378  |
| -6  | 0.0014233949  | 0.0006434711  | 0.0009133874  |
| -7  | -0.0001445315 | 0.0002100411  | -0.0000912935 |
| -8  | -0.0017663364 | -0.0025592969 | -0.0007664862 |
| -9  | -0.0000350644 | -0.0003068562 | -0.0000107912 |
| -10 | 0.0000969845  | 0.0022204035  | 0.0007269306  |
| -11 | 0.0008708470  | 0.0004030839  | 0.0001472702  |
| -12 | 0.0006339346  | -0.0022300036 | 0.0009740233  |
| -13 | -0.0002584024 | -0.0005773441 | -0.0000422349 |
| -14 | -0.0009595681 | 0.0015623587  | -0.0016058874 |
| -15 | 0.0011666284  | 0.0000450536  | 0.0002005003  |

---

CAS, E = -530.9409089

MP2-CAS, E = -530.8885126

Rh-S0-IM

| Atomic<br>Number | Coordinates (Angstroms) |           |           |
|------------------|-------------------------|-----------|-----------|
|                  | X                       | Y         | Z         |
| Rh               | -0.250259               | 0.000000  | -0.117663 |
| C                | 1.196226                | -0.000000 | 1.812338  |
| C                | -1.758357               | 0.000000  | -1.191099 |
| O                | -2.732392               | 0.000000  | -1.848404 |
| H                | 2.276738                | -0.000000 | 1.751948  |
| C                | 0.376120                | -1.177018 | 1.947500  |
| H                | 0.723747                | -2.198067 | 1.976769  |
| C                | -0.970990               | 0.739491  | 1.955920  |
| H                | -1.850443               | 1.359098  | 2.056250  |
| C                | -0.970990               | -0.739491 | 1.955920  |
| H                | -1.850443               | -1.359098 | 2.056250  |
| C                | 0.376120                | 1.177018  | 1.947500  |
| H                | 0.723747                | 2.198067  | 1.976769  |

CAS, E = -417.5872673

MP2-CAS, E = -417.5700512

Rh-S0-Cpx

| Atomic<br>Number | Coordinates (Angstroms) |           |           |
|------------------|-------------------------|-----------|-----------|
|                  | X                       | Y         | Z         |
| Rh               | 0.000000                | 0.000000  | 0.000000  |
| C                | 1.226665                | 0.000000  | 1.997810  |
| C                | -1.270457               | 0.006023  | -1.341823 |
| O                | -2.074966               | 0.009836  | -2.191525 |
| H                | 2.306563                | -0.000833 | 1.971639  |
| C                | 0.384669                | -1.170374 | 2.072705  |
| H                | 0.721537                | -2.195311 | 2.112261  |
| C                | -0.972559               | 0.717385  | 2.062794  |
| H                | -1.841838               | 1.358587  | 2.094308  |
| C                | -0.965723               | -0.736450 | 2.086109  |

|    |           |           |           |
|----|-----------|-----------|-----------|
| H  | -1.823921 | -1.390903 | 2.138158  |
| C  | 0.381039  | 1.164833  | 2.057389  |
| H  | 0.716837  | 2.191362  | 2.083697  |
| Si | 1.481967  | 1.213511  | -1.478262 |
| H  | 0.939919  | -0.782078 | -0.970015 |
| C  | 0.725475  | 2.941636  | -1.637987 |
| H  | 1.377708  | 3.602988  | -2.224790 |
| H  | -0.249566 | 2.900105  | -2.137571 |
| H  | 0.576616  | 3.394615  | -0.651048 |
| C  | 1.670665  | 0.487284  | -3.213609 |
| H  | 0.694934  | 0.306039  | -3.680547 |
| H  | 2.226204  | 1.179963  | -3.858580 |
| H  | 2.212845  | -0.465190 | -3.191956 |
| C  | 3.176204  | 1.338044  | -0.651583 |
| H  | 3.093330  | 1.810047  | 0.334113  |
| H  | 3.856095  | 1.946347  | -1.262626 |
| H  | 3.630543  | 0.349490  | -0.518758 |

-----  
CAS, E = -827.5776195

MP2-CAS, E = -827.5310693  
-----

Rh-S0-TS1  
-----

| Atomic<br>Number | Coordinates (Angstroms) |           |           |
|------------------|-------------------------|-----------|-----------|
|                  | X                       | Y         | Z         |
| Rh               | 0.000000                | 0.000000  | 0.000000  |
| C                | 1.204048                | 0.000000  | 2.142075  |
| C                | -1.166406               | -0.605128 | -1.290624 |
| O                | -1.910308               | -0.991063 | -2.113749 |
| H                | 2.279791                | 0.058911  | 2.239834  |
| C                | 0.442774                | -1.185570 | 2.062838  |
| H                | 0.820158                | -2.196051 | 2.088497  |
| C                | -1.022110               | 0.663869  | 2.066022  |
| H                | -1.927152               | 1.251702  | 2.095498  |
| C                | -0.938066               | -0.785776 | 1.884320  |
| H                | -1.760524               | -1.474712 | 1.754198  |
| C                | 0.295355                | 1.143392  | 2.182328  |
| H                | 0.563524                | 2.181541  | 2.318154  |
| Si               | 2.890010                | 0.644806  | -1.332025 |

|     |       |       |       |          |           |           |
|-----|-------|-------|-------|----------|-----------|-----------|
| H   |       |       |       | 2.427016 | -0.679336 | -0.815325 |
| C   |       |       |       | 1.401093 | 1.583448  | -2.029661 |
| H   |       |       |       | 1.730170 | 2.571726  | -2.378002 |
| H   |       |       |       | 0.958545 | 1.060709  | -2.884265 |
| H   |       |       |       | 0.594726 | 1.794814  | -1.299719 |
| C   |       |       |       | 4.150535 | 0.375319  | -2.709267 |
| H   |       |       |       | 3.765996 | -0.307633 | -3.474707 |
| H   |       |       |       | 4.393825 | 1.326063  | -3.199367 |
| H   |       |       |       | 5.083068 | -0.049359 | -2.320559 |
| C   |       |       |       | 3.653143 | 1.626334  | 0.090066  |
| H   |       |       |       | 2.881846 | 1.981807  | 0.783162  |
| H   |       |       |       | 4.192766 | 2.501742  | -0.291451 |
| H   |       |       |       | 4.363878 | 1.015811  | 0.659448  |
| -1  | 0.06  | -0.09 | 0.01  |          |           |           |
| -2  | -0.04 | 0.03  | 0.03  |          |           |           |
| -3  | 0.00  | 0.05  | -0.00 |          |           |           |
| -4  | -0.02 | 0.09  | -0.00 |          |           |           |
| -5  | -0.04 | 0.02  | 0.05  |          |           |           |
| -6  | -0.06 | 0.02  | 0.11  |          |           |           |
| -7  | -0.06 | 0.02  | 0.18  |          |           |           |
| -8  | -0.02 | 0.05  | -0.08 |          |           |           |
| -9  | -0.02 | 0.05  | -0.14 |          |           |           |
| -10 | -0.03 | 0.02  | 0.04  |          |           |           |
| -11 | -0.04 | 0.03  | 0.04  |          |           |           |
| -12 | -0.02 | 0.04  | -0.03 |          |           |           |
| -13 | -0.02 | 0.04  | -0.06 |          |           |           |
| -14 | -0.11 | 0.10  | -0.03 |          |           |           |
| -15 | -0.41 | 0.19  | -0.02 |          |           |           |
| -16 | 0.06  | 0.29  | -0.12 |          |           |           |
| -17 | 0.18  | 0.23  | -0.17 |          |           |           |
| -18 | -0.00 | 0.30  | -0.09 |          |           |           |
| -19 | 0.10  | 0.35  | -0.11 |          |           |           |
| -20 | -0.07 | -0.13 | 0.05  |          |           |           |
| -21 | -0.10 | -0.12 | 0.06  |          |           |           |
| -22 | 0.05  | -0.17 | 0.02  |          |           |           |
| -23 | -0.13 | -0.21 | 0.11  |          |           |           |
| -24 | -0.03 | -0.03 | 0.01  |          |           |           |
| -25 | -0.00 | 0.02  | 0.01  |          |           |           |
| -26 | 0.06  | -0.06 | 0.04  |          |           |           |
| -27 | -0.09 | -0.11 | -0.00 |          |           |           |

---

CAS, E = -827.4761954  
MP2-CAS, E = -827.4364583

---

Rh-S0-Pro

---

| Atomic<br>Number | Coordinates (Angstroms) |           |           |
|------------------|-------------------------|-----------|-----------|
|                  | X                       | Y         | Z         |
| Rh               | 0.000000                | 0.000000  | 0.000000  |
| C                | 1.220398                | 0.000000  | 1.978957  |
| C                | -1.193836               | -0.064223 | -1.404881 |
| O                | -1.950860               | -0.104948 | -2.295732 |
| H                | 2.299245                | -0.005838 | 1.930993  |
| C                | 0.367977                | -1.161534 | 2.073323  |
| H                | 0.693905                | -2.190341 | 2.108848  |
| C                | -0.976720               | 0.731119  | 2.107341  |
| H                | -1.840037               | 1.377350  | 2.172861  |
| C                | -0.980151               | -0.713438 | 2.134443  |
| H                | -1.850521               | -1.346967 | 2.224333  |
| C                | 0.380282                | 1.168551  | 2.048363  |
| H                | 0.714700                | 2.196170  | 2.061685  |
| Si               | 1.226452                | 1.598870  | -1.281875 |
| H                | 0.938612                | -0.848416 | -0.893599 |
| C                | 0.269916                | 3.230406  | -1.220648 |
| H                | 0.096881                | 3.556140  | -0.188678 |
| H                | 0.824908                | 4.023340  | -1.740380 |
| H                | -0.707894               | 3.130328  | -1.707100 |
| C                | 1.450659                | 1.100957  | -3.091037 |
| H                | 0.489864                | 0.934529  | -3.592413 |
| H                | 1.978390                | 1.893780  | -3.637601 |
| H                | 2.038857                | 0.180296  | -3.177335 |
| C                | 2.931457                | 1.826170  | -0.496946 |
| H                | 2.856107                | 2.209720  | 0.527015  |
| H                | 3.523187                | 2.542340  | -1.083137 |
| H                | 3.481330                | 0.878742  | -0.465062 |

---

CAS, E = -827.5961953  
MP2-CAS, E = -827.5520654

---

## Ir-S0-Rea

---

| Atomic<br>Number | Coordinates (Angstroms) |           |           |
|------------------|-------------------------|-----------|-----------|
|                  | X                       | Y         | Z         |
| 77               | 0.000000                | 0.000000  | 0.000000  |
| 6                | 1.200037                | 0.000000  | 1.969008  |
| 6                | -1.261098               | -0.000236 | -1.326326 |
| 8                | -2.047123               | -0.000383 | -2.153005 |
| 1                | 2.277983                | 0.000442  | 1.948032  |
| 6                | 0.368788                | -1.157918 | 2.011978  |
| 1                | 0.695580                | -2.183978 | 2.029362  |
| 6                | -0.972085               | 0.715014  | 2.001880  |
| 1                | -1.840322               | 1.353642  | 2.010383  |
| 6                | -0.971512               | -0.716647 | 2.001381  |
| 1                | -1.838884               | -1.356475 | 2.009436  |
| 6                | 0.367903                | 1.157276  | 2.012586  |
| 1                | 0.694141                | 2.183491  | 2.030522  |
| 6                | 1.254154                | 0.000989  | -1.329263 |
| 8                | 2.037204                | 0.001607  | -2.159209 |

---

CAS, E = -524.8394007

MP2-CAS, E = -524.774616

## Ir-S1/S0-CI

---

| Atomic<br>Number | Coordinates (Angstroms) |           |           |
|------------------|-------------------------|-----------|-----------|
|                  | X                       | Y         | Z         |
| 77               | 0.212505                | 0.236585  | -0.354396 |
| 6                | 1.114533                | 0.165940  | 1.671806  |
| 6                | -1.257002               | 0.076461  | -1.530338 |
| 8                | -2.184416               | -0.083025 | -2.202162 |
| 1                | 2.169795                | 0.196352  | 1.748523  |
| 6                | 0.321753                | -1.029605 | 1.640996  |
| 1                | 0.686511                | -2.014023 | 1.463577  |
| 6                | -1.024044               | 0.654284  | 2.551370  |
| 1                | -1.870081               | 1.189020  | 2.879884  |
| 6                | -1.016801               | -0.704323 | 2.198387  |
| 1                | -1.827961               | -1.394547 | 2.320129  |

---



|   |          |           |           |
|---|----------|-----------|-----------|
| 6 | 0.218216 | 1.229956  | 2.133682  |
| 1 | 0.447233 | 2.275718  | 2.131757  |
| 6 | 1.967880 | -0.291472 | -1.535700 |
| 8 | 2.797859 | -0.507420 | -2.266316 |

Gradient Difference:

|     |               |               |               |
|-----|---------------|---------------|---------------|
| -1  | 0.0042856942  | 0.0211920049  | -0.0030234418 |
| -2  | -0.0019729244 | 0.0339678773  | 0.0184292219  |
| -3  | -0.0064712109 | 0.0130270928  | -0.0002167512 |
| -4  | 0.0019025220  | -0.0048096608 | 0.0001604120  |
| -5  | 0.0026309015  | 0.0005911078  | -0.0008409271 |
| -6  | -0.0225012831 | -0.0121928381 | 0.0053740590  |
| -7  | -0.0001901319 | -0.0015263945 | -0.0001338555 |
| -8  | -0.0136271166 | -0.0361029487 | -0.0173238676 |
| -9  | -0.0059075665 | 0.0029826176  | 0.0033713831  |
| -10 | 0.0095085038  | 0.0017042886  | 0.0111578979  |
| -11 | 0.0044451208  | 0.0040712007  | -0.0001734475 |
| -12 | 0.0344110663  | -0.0033974937 | -0.0262161874 |
| -13 | 0.0011529609  | -0.0051348842 | 0.0024851026  |
| -14 | -0.0122938378 | -0.0169161026 | 0.0110640549  |
| -15 | 0.0046273018  | 0.0025441330  | -0.0041136532 |

-----

Derivative Coupling

|     |               |               |               |
|-----|---------------|---------------|---------------|
| -1  | -0.0019056392 | -0.0084821920 | 0.0175994965  |
| -2  | 0.0004104664  | -0.0094211611 | -0.0087489736 |
| -3  | 0.0072695402  | -0.0037929292 | -0.0186032916 |
| -4  | -0.0038186732 | 0.0010579246  | 0.0023930185  |
| -5  | 0.0021868983  | -0.0001367103 | 0.0000020441  |
| -6  | -0.0158746778 | 0.0038273293  | 0.0123384417  |
| -7  | 0.0003258597  | 0.0004919108  | 0.0010511858  |
| -8  | 0.0244771019  | 0.0369472462  | -0.0066143899 |
| -9  | -0.0009588682 | 0.0022568686  | 0.0011027214  |
| -10 | 0.0194503794  | -0.0279708030 | -0.0154713181 |
| -11 | 0.0008202533  | -0.0010050892 | -0.0005847338 |
| -12 | -0.0223583228 | 0.0001451620  | 0.0161248750  |
| -13 | 0.0000027122  | -0.0008700469 | 0.0010666217  |
| -14 | -0.0121804718 | 0.0094780944  | -0.0019982583 |
| -15 | 0.0021534417  | -0.0025256042 | 0.0003425605  |

-----

CAS, E = -524.7369196

MP2-CAS, E = -524.6915971

---

---

Ir-S0-Int

---

| Atomic<br>Number | Coordinates (Angstroms) |           |           |
|------------------|-------------------------|-----------|-----------|
|                  | X                       | Y         | Z         |
| 77               | -0.422993               | -0.221823 | -0.052295 |
| 6                | 1.206862                | 0.024367  | 1.823783  |
| 6                | -1.729892               | 0.287823  | -1.198381 |
| 8                | -2.592476               | 0.607599  | -1.944989 |
| 1                | 2.282647                | 0.068979  | 1.732320  |
| 6                | 0.435374                | -1.195855 | 2.083099  |
| 1                | 0.857642                | -2.181695 | 2.213093  |
| 6                | -1.040511               | 0.569109  | 1.816283  |
| 1                | -1.941929               | 1.156896  | 1.902042  |
| 6                | -0.928852               | -0.865472 | 2.161277  |
| 1                | -1.751904               | -1.528813 | 2.379887  |
| 6                | 0.328057                | 1.120167  | 1.751346  |
| 1                | 0.586799                | 2.158717  | 1.612534  |

---

CAS, E = -411.4326762

MP2-CAS, E = -411.3882872

---

Ir-S0-Cpx

---

| Atomic<br>Number | Coordinates (Angstroms) |           |           |
|------------------|-------------------------|-----------|-----------|
|                  | X                       | Y         | Z         |
| 77               | -0.000000               | 0.000000  | -0.000000 |
| 6                | 1.180886                | 0.000000  | 2.192165  |
| 6                | -1.257018               | 0.061324  | -1.302726 |
| 8                | -2.078686               | 0.101409  | -2.154272 |
| 1                | 2.245602                | 0.015890  | 2.377086  |
| 6                | 0.384776                | -1.187578 | 2.104345  |
| 1                | 0.715478                | -2.208263 | 2.205132  |
| 6                | -0.985145               | 0.715131  | 1.860115  |
| 1                | -1.853767               | 1.345675  | 1.748170  |
| 6                | -0.960757               | -0.767955 | 1.826490  |
| 1                | -1.796532               | -1.436009 | 1.686792  |
| 6                | 0.342640                | 1.166243  | 2.148018  |

|    |          |           |           |
|----|----------|-----------|-----------|
| 1  | 0.644011 | 2.192016  | 2.289574  |
| 14 | 2.718653 | -0.518688 | -1.579108 |
| 1  | 2.134062 | -1.767209 | -1.021401 |
| 6  | 1.505989 | 0.555611  | -2.581824 |
| 1  | 2.171207 | 1.130426  | -3.242378 |
| 1  | 0.838553 | -0.041125 | -3.210688 |
| 1  | 0.906730 | 1.289970  | -2.033261 |
| 6  | 4.008951 | -1.069846 | -2.848973 |
| 1  | 3.558152 | -1.705013 | -3.619695 |
| 1  | 4.439833 | -0.192862 | -3.349391 |
| 1  | 4.828989 | -1.629168 | -2.385828 |
| 6  | 3.581006 | 0.518985  | -0.252534 |
| 1  | 2.925853 | 1.291724  | 0.166732  |
| 1  | 4.441077 | 1.026945  | -0.707393 |
| 1  | 3.958477 | -0.099441 | 0.567983  |

-----

CAS, E = -821.38976126

MP2-CAS, E = -821.3436158

-----

Ir-S0-TS

-----

| Atomic<br>Number | Coordinates (Angstroms) |           |           |
|------------------|-------------------------|-----------|-----------|
|                  | X                       | Y         | Z         |
| 77               | 0.000000                | -0.000000 | 0.000000  |
| 6                | 1.216444                | -0.000000 | 2.038890  |
| 6                | -1.331706               | 0.166987  | -1.243055 |
| 8                | -2.186866               | 0.274219  | -2.041287 |
| 1                | 2.294574                | -0.010701 | 2.071057  |
| 6                | 0.356649                | -1.165811 | 2.129077  |
| 1                | 0.670631                | -2.192154 | 2.240425  |
| 6                | -0.981657               | 0.719135  | 1.927634  |
| 1                | -1.850533               | 1.355650  | 1.861283  |
| 6                | -0.987999               | -0.732923 | 2.074597  |
| 1                | -1.853685               | -1.375111 | 2.137683  |
| 6                | 0.388600                | 1.167851  | 1.993099  |
| 1                | 0.728940                | 2.190668  | 1.984780  |
| 14               | 1.447129                | 0.934760  | -1.447252 |
| 1                | 1.332227                | -0.836513 | -1.580619 |
| 6                | 1.020774                | 2.806826  | -1.368955 |

|     |       |       |       |          |           |           |
|-----|-------|-------|-------|----------|-----------|-----------|
|     | 1     |       |       | 1.765996 | 3.384310  | -1.933257 |
|     | 1     |       |       | 0.034837 | 2.993926  | -1.814550 |
|     | 1     |       |       | 1.000103 | 3.175264  | -0.336496 |
|     | 6     |       |       | 1.423047 | 0.672862  | -3.347501 |
|     | 1     |       |       | 0.391694 | 0.590605  | -3.716760 |
|     | 1     |       |       | 1.884700 | 1.540718  | -3.835369 |
|     | 1     |       |       | 1.961779 | -0.227692 | -3.666893 |
|     | 6     |       |       | 3.259831 | 0.854353  | -0.863995 |
|     | 1     |       |       | 3.361263 | 1.298423  | 0.135162  |
|     | 1     |       |       | 3.891166 | 1.438792  | -1.546533 |
|     | 1     |       |       | 3.650925 | -0.168457 | -0.824962 |
| -1  | -0.01 | 0.00  | 0.01  |          |           |           |
| -2  | -0.00 | -0.01 | 0.01  |          |           |           |
| -3  | 0.01  | -0.00 | 0.01  |          |           |           |
| -4  | 0.00  | -0.00 | 0.00  |          |           |           |
| -5  | 0.00  | -0.00 | -0.00 |          |           |           |
| -6  | -0.02 | -0.01 | 0.01  |          |           |           |
| -7  | -0.02 | -0.01 | 0.01  |          |           |           |
| -8  | 0.03  | 0.01  | -0.01 |          |           |           |
| -9  | 0.03  | 0.01  | -0.01 |          |           |           |
| -10 | -0.01 | -0.01 | 0.00  |          |           |           |
| -11 | -0.01 | -0.01 | 0.01  |          |           |           |
| -12 | 0.02  | -0.01 | -0.00 |          |           |           |
| -13 | 0.02  | -0.00 | -0.00 |          |           |           |
| -14 | 0.01  | 0.00  | -0.07 |          |           |           |
| -15 | 0.83  | -0.21 | -0.38 |          |           |           |
| -16 | -0.02 | 0.01  | -0.03 |          |           |           |
| -17 | -0.03 | 0.00  | -0.04 |          |           |           |
| -18 | -0.02 | 0.01  | -0.03 |          |           |           |
| -19 | -0.03 | 0.01  | -0.05 |          |           |           |
| -20 | 0.10  | -0.00 | 0.06  |          |           |           |
| -21 | 0.02  | -0.00 | -0.00 |          |           |           |
| -22 | 0.06  | 0.06  | 0.15  |          |           |           |
| -23 | 0.21  | -0.02 | 0.08  |          |           |           |
| -24 | 0.02  | -0.03 | 0.03  |          |           |           |
| -25 | 0.01  | -0.00 | 0.04  |          |           |           |
| -26 | 0.01  | -0.02 | 0.05  |          |           |           |
| -27 | 0.03  | -0.07 | 0.03  |          |           |           |

---

CAS, E = -821.3428761

MP2-CAS, E = -821.3017868

---

Ir-S0-Pro

---

| Atomic<br>Number | Coordinates (Angstroms) |           |           |
|------------------|-------------------------|-----------|-----------|
|                  | X                       | Y         | Z         |
| 77               | 0.000000                | 0.000000  | 0.000000  |
| 6                | 1.225812                | 0.000000  | 1.968535  |
| 6                | -1.203392               | -0.035671 | -1.370456 |
| 8                | -1.979491               | -0.058677 | -2.254300 |
| 1                | 2.303644                | 0.001417  | 1.922986  |
| 6                | 0.375019                | -1.166208 | 2.051994  |
| 1                | 0.705269                | -2.193199 | 2.079872  |
| 6                | -0.984467               | 0.721453  | 2.085830  |
| 1                | -1.853947               | 1.358639  | 2.143672  |
| 6                | -0.980194               | -0.723587 | 2.114280  |
| 1                | -1.846182               | -1.362866 | 2.197278  |
| 6                | 0.374956                | 1.166052  | 2.022302  |
| 1                | 0.705521                | 2.194057  | 2.024034  |
| 14               | 1.226400                | 1.630588  | -1.257288 |
| 1                | 0.903054                | -0.929198 | -0.887967 |
| 6                | 0.288964                | 3.275844  | -1.237201 |
| 1                | 0.117233                | 3.628033  | -0.213065 |
| 1                | 0.850218                | 4.052383  | -1.774094 |
| 1                | -0.689338               | 3.170704  | -1.721904 |
| 6                | 1.476339                | 1.111671  | -3.057797 |
| 1                | 0.519792                | 0.935216  | -3.564429 |
| 1                | 2.008894                | 1.895461  | -3.612386 |
| 1                | 2.065904                | 0.189716  | -3.122116 |
| 6                | 2.929285                | 1.879460  | -0.466215 |
| 1                | 2.850396                | 2.261104  | 0.558886  |
| 1                | 3.513999                | 2.603914  | -1.048927 |
| 1                | 3.490267                | 0.937989  | -0.437385 |

---

CAS, E = -821.43387611

MP2-CAS, E = -821.3902814

---

SiMe3(H) in CAS(2,2)/Def2-SVPD

---

| Atomic<br>Number | Coordinates (Angstroms) |          |          |
|------------------|-------------------------|----------|----------|
|                  | X                       | Y        | Z        |
| Si               | 2.58883                 | 0.31522  | -2.21231 |
| C                | 4.42317                 | 0.20378  | -1.8755  |
| H                | 4.93281                 | -0.19913 | -2.75615 |
| H                | 4.63898                 | -0.45467 | -1.03106 |
| H                | 4.84875                 | 1.18514  | -1.66144 |
| C                | 2.23735                 | 1.42165  | -3.67645 |
| H                | 2.59026                 | 0.95844  | -4.60339 |
| H                | 2.74438                 | 2.3827   | -3.56376 |
| H                | 1.16647                 | 1.61688  | -3.78557 |
| C                | 1.87435                 | -1.39974 | -2.45395 |
| H                | 2.39977                 | -1.89921 | -3.2719  |
| H                | 0.81228                 | -1.38692 | -2.70958 |
| H                | 1.99833                 | -2.00712 | -1.5551  |
| H                | 1.93454                 | 0.93376  | -1.00199 |

CAS, E = -409.947862

MP2-CAS, E = -409.932468

CO (singlet)

| Center<br>Number | Atomic<br>Number | Atomic<br>Type | Coordinates (Angstroms) |          |          |
|------------------|------------------|----------------|-------------------------|----------|----------|
|                  |                  |                | X                       | Y        | Z        |
|                  | 6                |                | 0.000000                | 0.000000 | 0.000000 |
|                  | 8                |                | 0.000000                | 0.000000 | 1.125018 |

CAS, E = -113.362853

MP2-CAS, E = -113.335285

CO (triplet)

| Center<br>Number | Atomic<br>Number | Atomic<br>Type | Coordinates (Angstroms) |          |          |
|------------------|------------------|----------------|-------------------------|----------|----------|
|                  |                  |                | X                       | Y        | Z        |
|                  | 6                |                | 0.000000                | 0.000000 | 0.000000 |
|                  | 8                |                | 0.000000                | 0.000000 | 1.201359 |

CAS, E = -113.1526371

MP2-CAS, E = -113.1154526
